# Supplementary material for: Socioeconomic and environmental factors associated with malaria hotspots in the Nanoro demographic surveillance area, Burkina Faso
Source: PubMed Central journal article supplement (PMC6396465; doi:10.1186/s12889-019-6565-z), 2019-02-28

Hotspot: Low transmission season, 2010

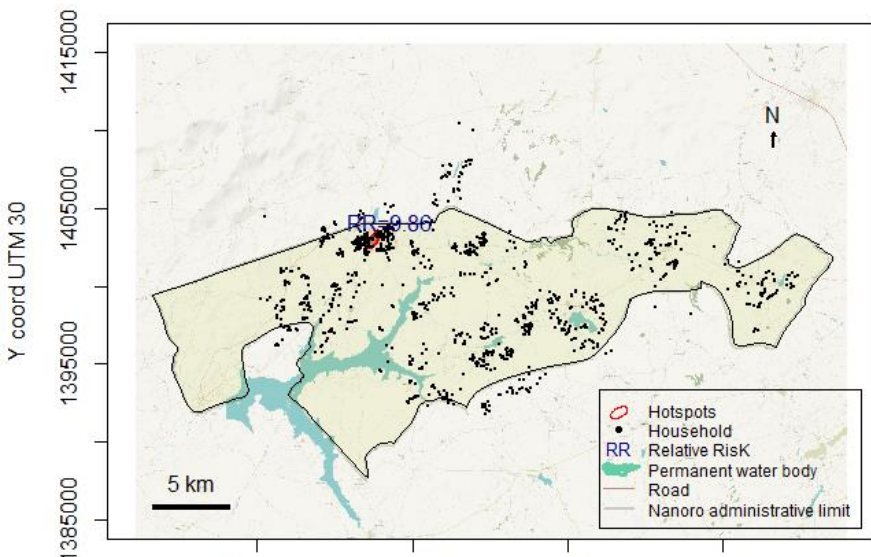

Hotspot: Intermediate transmission season, 2010

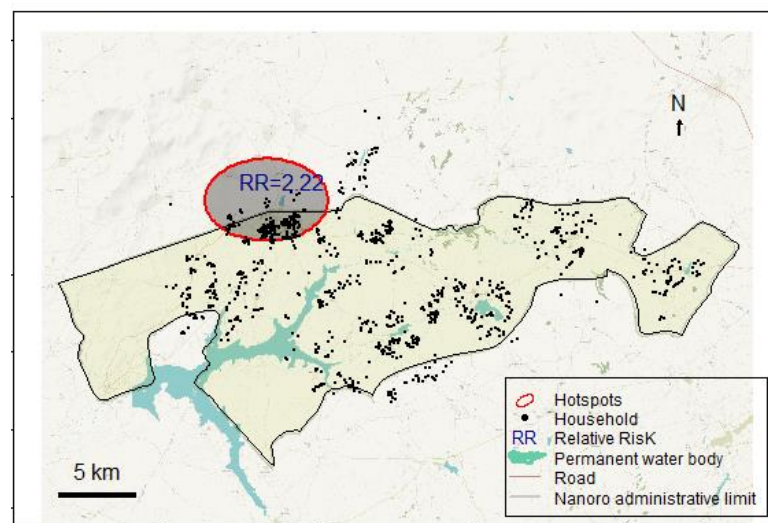

Hotspot: High transmission season, 2010

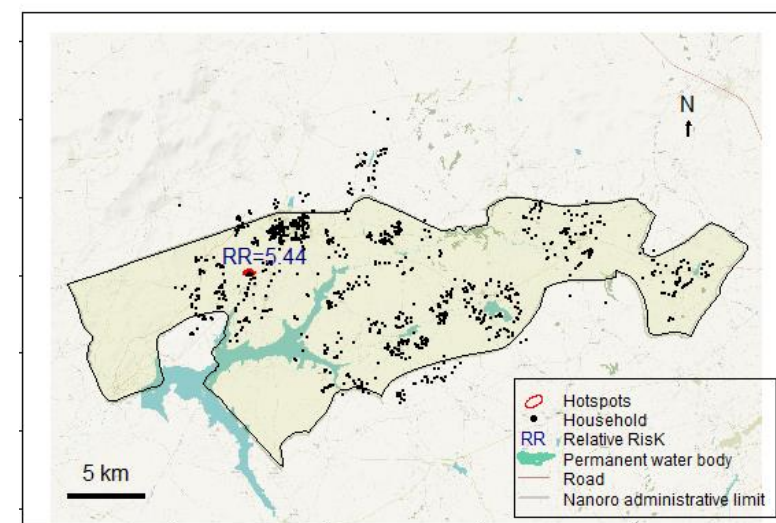

Hotspot: Low transmission season, 2011

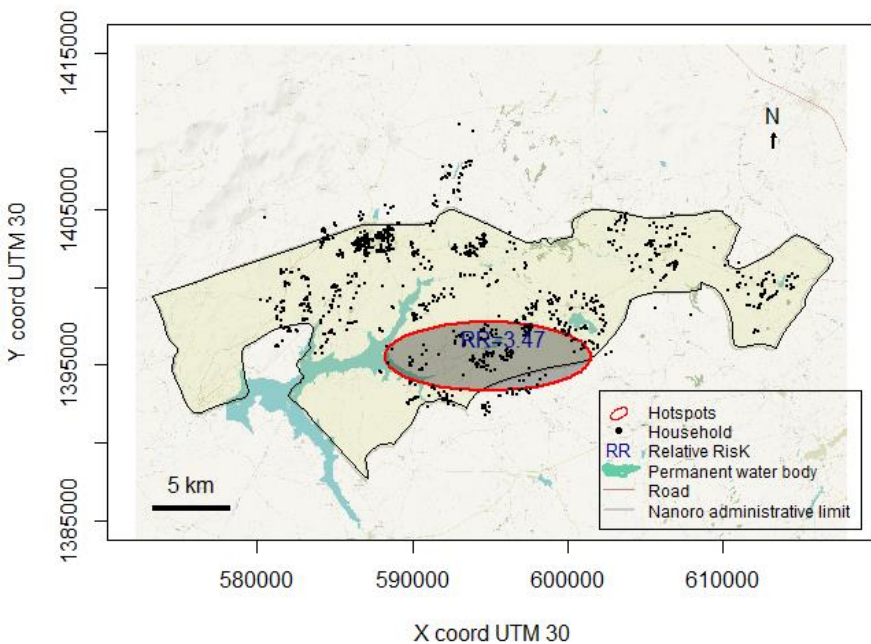

Hotspot: Intermediate transmission season, 2010-2011

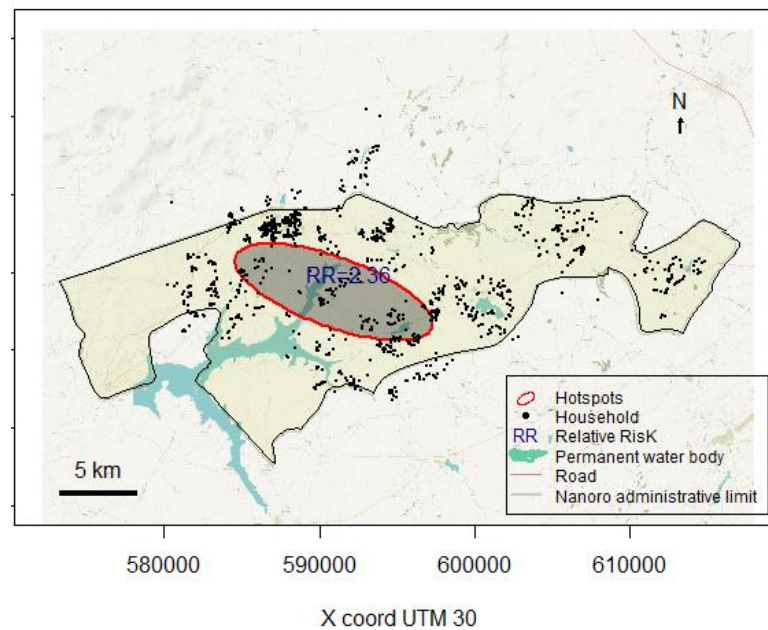

Hotspot: High transmission season, 2011

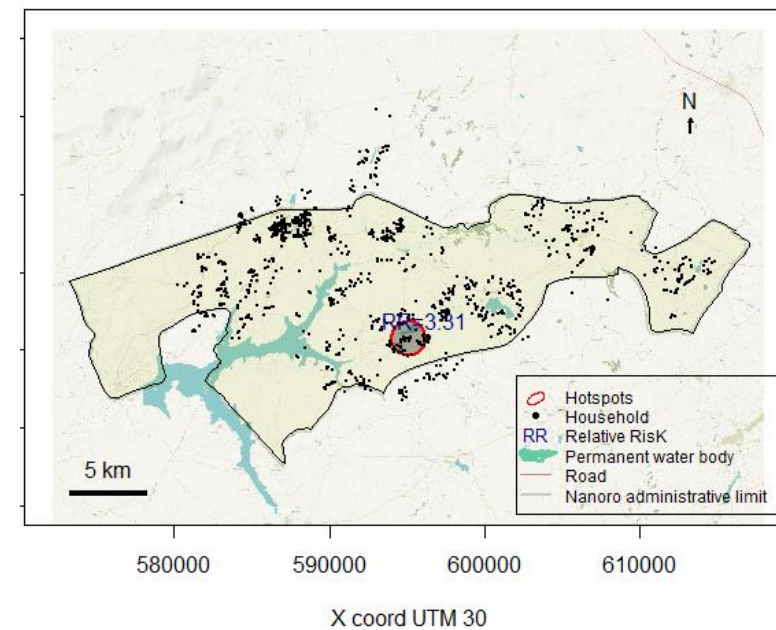



Hotspot: Low transmission season, 2012

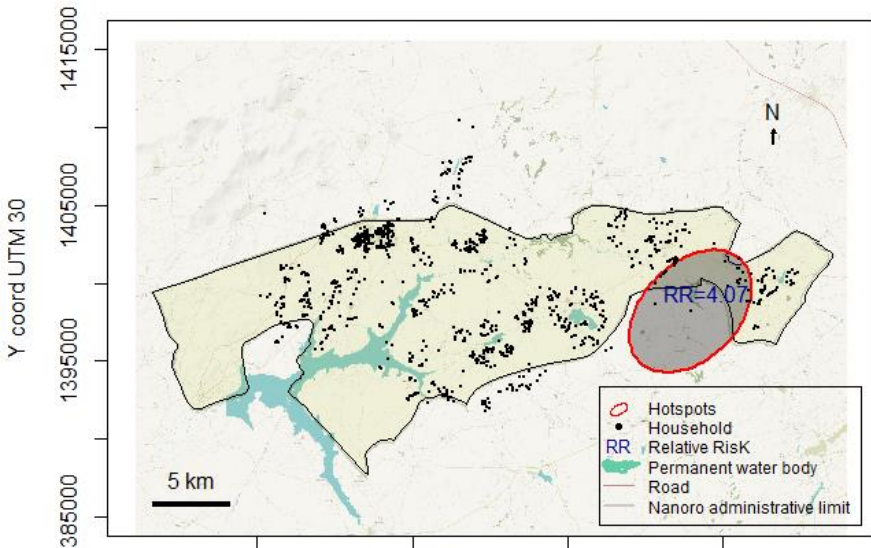

Hotspot: Intermediate transmission season, 2011-2012

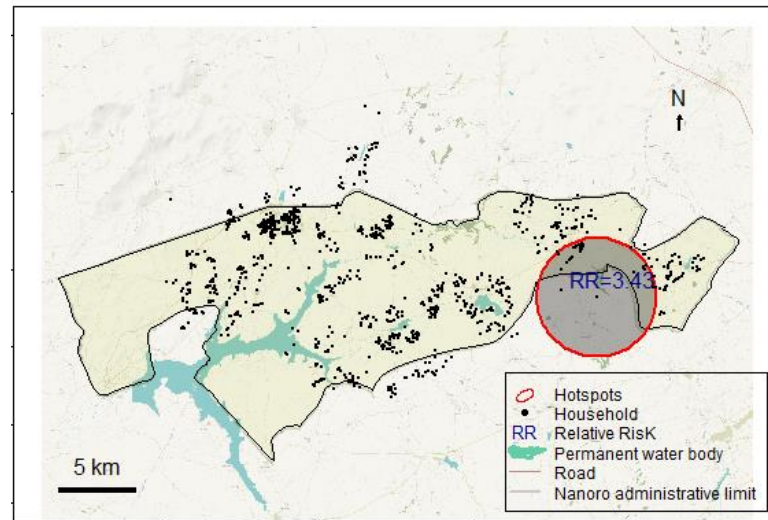

Hotspot: High transmission season, 2012

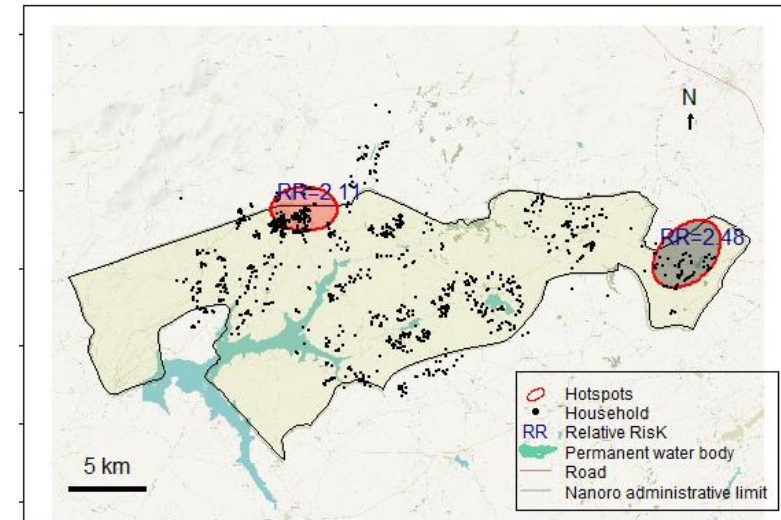

Hotspot: Low transmission season, 2013

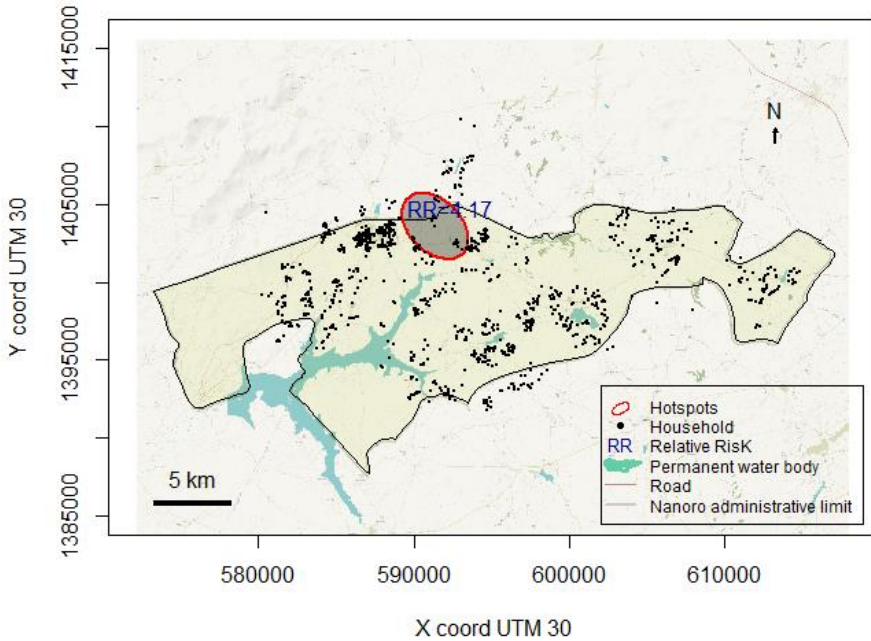

Hotspot: Intermediate transmission season, 2012-2013

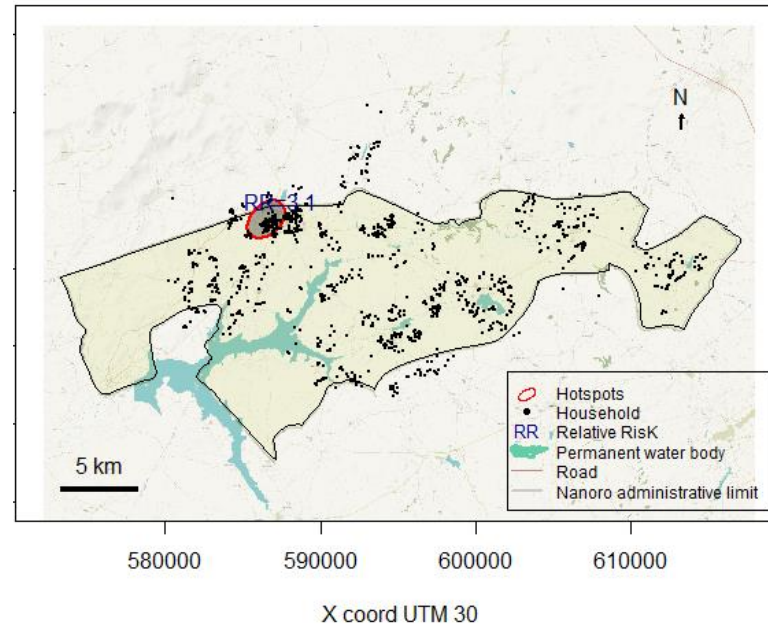

Hotspot: High transmission season, 2013

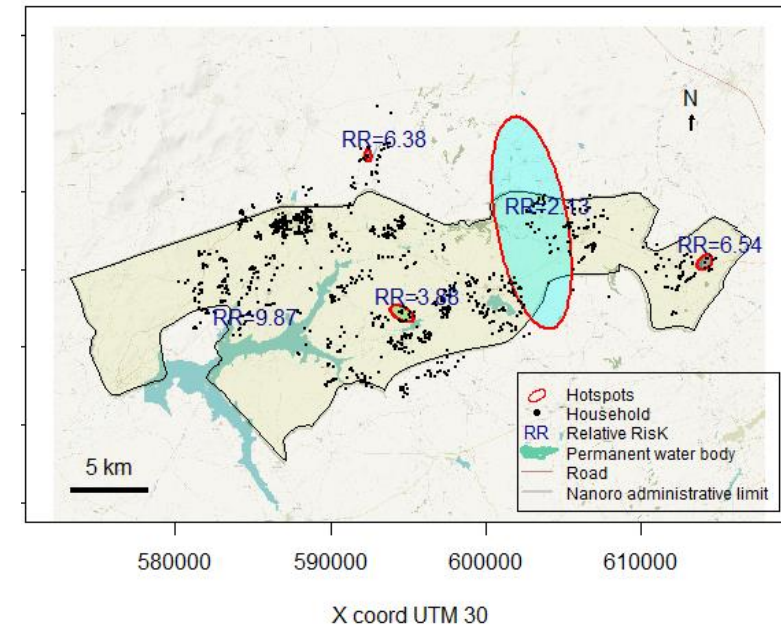

Hotspot: Low transmission season, 2014

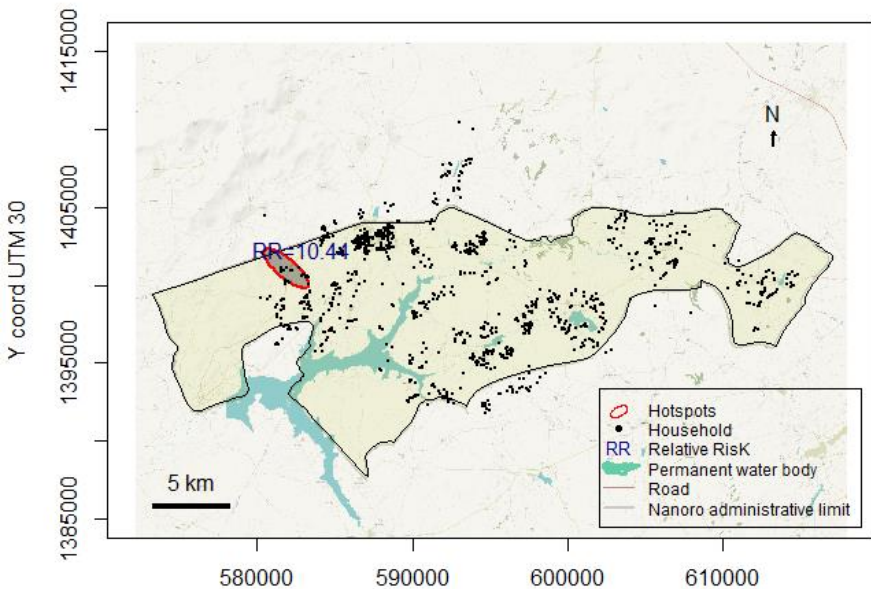

Hotspot: Intermediate transmission season, 2013-2014

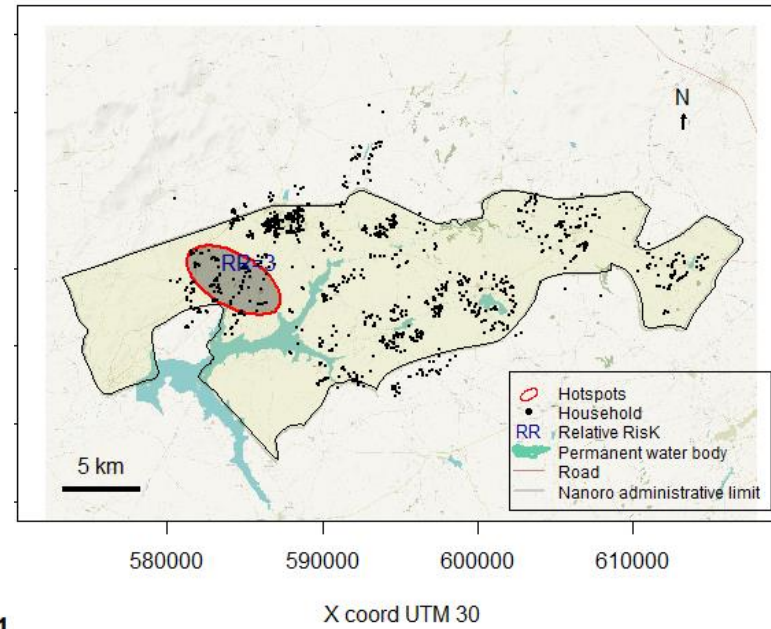

Hotspot: High transmission season, 2014

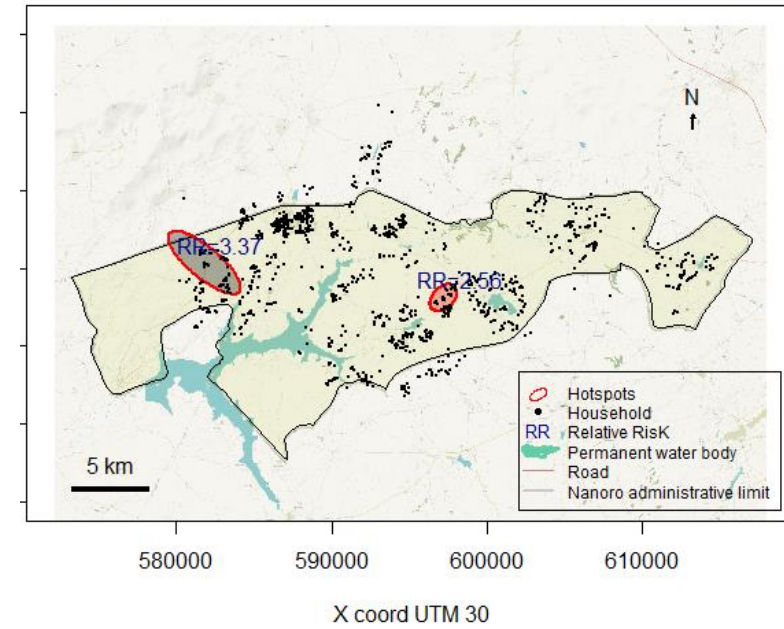

Hotspot: Intermediate transmission season, 2014-11-10 to 2014-12-31

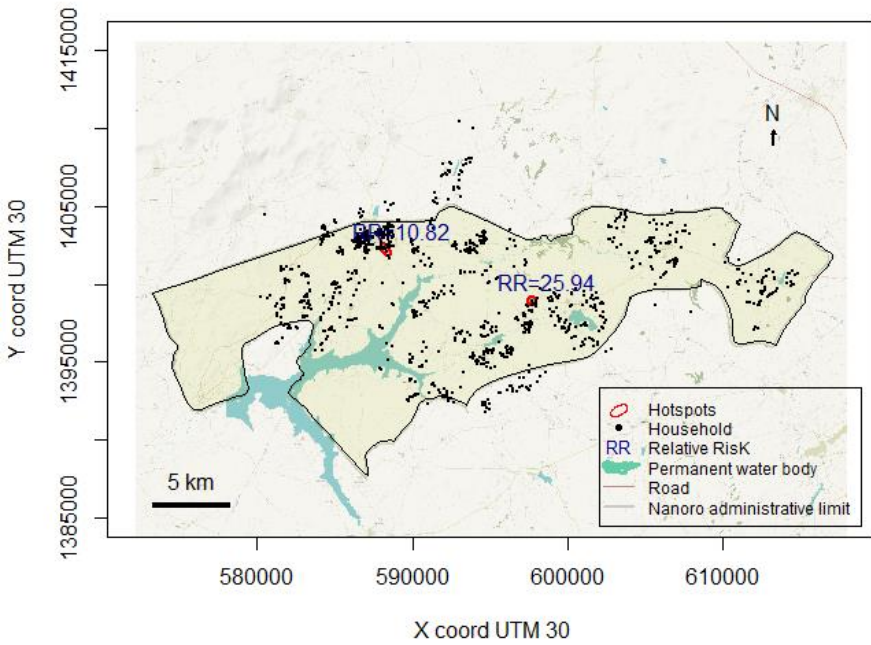

Supplement: 12889_2019_6565_MOESM3_ESM.pdf [file 12889_2019_6565_MOESM3_ESM.pdf]
